# Supplementary figures and images for: NAD metabolites interfere with proliferation and functional properties of THP-1 cells
Source: PubMed Central journal article supplement — Innate Immun. 2019 May 3;25(5):280–93. doi: 10.1177/1753425919844587 (PMC6830904; doi:10.1177/1753425919844587), 2019-05-03

**Supplemental figure S1**

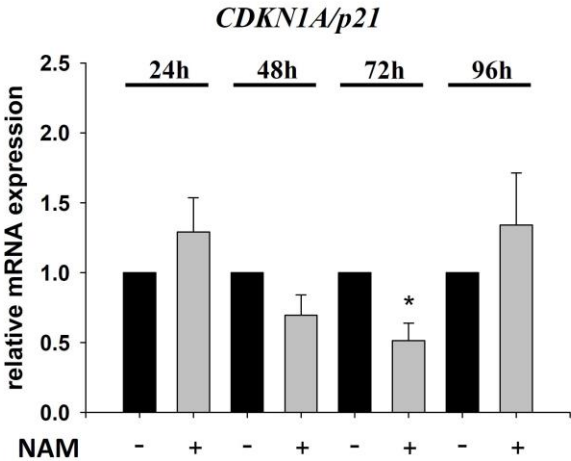

Supplement: Supplemental_Material1.pdf [file Supplemental_Material1.pdf]
